# Supplementary material
Source: MDPI journal article supplement (https://www.mdpi.com/2079-6412/10/4/377)
Supplement: s1 [file s1]

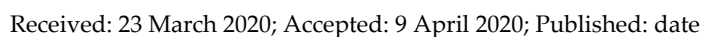

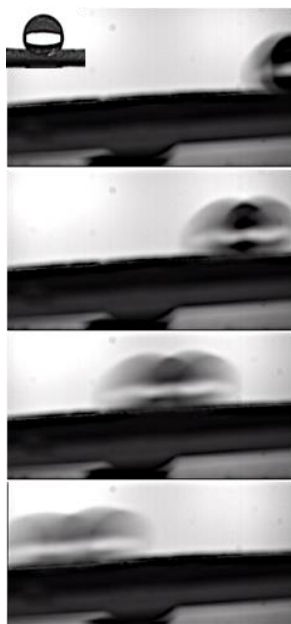

**Figure S2.** Waterdrops rolled on  $\text{Cu}^{2+}/\text{HNO}_3$ -etched zinc + fluoropolyurethane (rolling angle  $8 \pm 1.6^\circ$ ).

**Table S1.** Uncertainty/error and parameters of non-standard design microchannel.

| Parameters of Non-standard Design Microchannel | Set Value (SV)                                                                                                                                                                                      |
|------------------------------------------------|-----------------------------------------------------------------------------------------------------------------------------------------------------------------------------------------------------|
| Microchannel parameter and dimensions          | 100 mm $\times$ 20 mm $\times$ variable h;<br>jet inlet/outlet: r = 5 mm, h = 10 mm                                                                                                                 |
| Volume flow rate                               | $1 \times 10^{-5}$ to $7 \times 10^{-5}$ m <sup>3</sup> /s                                                                                                                                          |
| Static pressure                                | 0–2.5MPa                                                                                                                                                                                            |
| Fluids property                                | DI water: $\rho = 998.2$ kg/m <sup>3</sup> , viscosity 1.00 mPa·s;                                                                                                                                  |
| Analogy method                                 | Finite volume method                                                                                                                                                                                |
| Solution method                                | Pressure-cased solver                                                                                                                                                                               |
| Algorithm                                      | PISO                                                                                                                                                                                                |
| Inlet condition                                | Velocity-inlet                                                                                                                                                                                      |
| Outlet condition                               | Free discharge                                                                                                                                                                                      |
| Test surface                                   | (a) Unetched zinc substrate,<br>(b) Unetched zinc + fluoropolyurethane,<br>(c) $\text{Cu}^{2+}/\text{HNO}_3$ etched zinc, and<br>(d) $\text{Cu}^{2+}/\text{HNO}_3$ etched zinc + fluoropolyurethane |

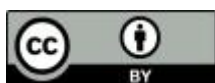

2020 by the authors. Submitted for possible open access publication under the terms and conditions of the Creative Commons Attribution (CC BY) license (<http://creativecommons.org/licenses/by/4.0/>).
